# Supplementary material for: Industrial ultra-low-carbon methanol synthesis routes: techno-economic analysis, life cycle environment assessment and multi-dimensional sustainability evaluation
Source: Royal Society of Chemistry journal article supplement (doi:10.1039/d4gc05482b), 2025-01-01
Supplement: d4gc05482b1.pdf [file d4gc05482b1.pdf]

## Supporting Materials

### **Industrial ultra-low carbon methanol synthesis routes: techno-economic analysis, life cycle environment assessment and multi-dimensional sustainability evaluation**

Dongrui Zhang<sup>1</sup>, Ruqiang Wang<sup>2</sup>, Zhibo Zhang<sup>1</sup>, Hao Yan<sup>1</sup>, Xin Zhou<sup>3\*</sup>, Hui Zhao<sup>1\*</sup>,  
Chaohe Yang<sup>1</sup>

1. *State Key Laboratory of Heavy Oil Processing, China University of Petroleum,*

*Qingdao, Shandong 266580, People's Republic of China;*

2. *China Petroleum Engineering and Planning Institute, Changping, Beijing,*

*People's Republic of China;*

3. *College of Chemistry and Chemical Engineering, Ocean University of China,*

*Qingdao, Shandong 266100, People's Republic of China;*

\*Corresponding Author: Hui Zhao, E-mail: [zhaohui@upc.edu.cn](mailto:zhaohui@upc.edu.cn)

\*\*Corresponding Author: Xin Zhou, E-mail: [xinzhou@ouc.edu.cn](mailto:xinzhou@ouc.edu.cn)

*The two corresponding authors contribute equally.*

This file contains: 14 pages, 3 sections, 1 figure, 11 tables.

---

## **Summary of figures and tables**

**Figure S1.** Distribution of crude syngas components with different key gasification parameters: (a) Coal gasification temperature; (b) Coal gasification pressure; (c) Biomass gasification temperature; (d) Biomass gasification pressure

**Table S1.** Green low-carbon methanol project enterprises, processing capacity and output in China.

**Table S2.** Composition analysis of the feed coal and crop straw.

**Table S3.** CTM, GH<sub>2</sub>-CTM and BTM processes industry/ literature and simulation data.

**Table S4.** Cost estimation of purchase equipment cost and total capital investment.

**Table S5.** CEPCI of different years.

**Table S6.** The prices of raw materials, products, utilities and transportation involved in the three synthetic routes.

**Table S7.** The price distribution of green hydrogen under different electricity prices.

**Table S8.** Detailed results of techno-economic analysis.

**Table S9.** The unified converted value of energy consuming working medium.

**Table S10.** The indirect GHG emission factors.

**Table S11.** The primary consumption factor of NED.

---

## 1. Low carbon methanol synthesis route process data

Green low-carbon methanol project enterprises, processing capacity and output in China are listed in Table S1.

**Table S1.** Green low-carbon methanol project enterprises, processing capacity and output in China.

| Items                                              | Process              | Scale       | Raw material                                       |
|----------------------------------------------------|----------------------|-------------|----------------------------------------------------|
| Baofeng Energy                                     | GH <sub>2</sub> -CTM | 6150000 t/a | Coal,<br>Green H <sub>2</sub>                      |
| Shanxi Coal Group Yulin chemical                   | GH <sub>2</sub> -CTM | 5600000 t/a | Coal,<br>Green H <sub>2</sub>                      |
| Yankuang XinJiang Energy&Chemical                  | GH <sub>2</sub> -CTM | 2200000 t/a | Coal,<br>Green H <sub>2</sub>                      |
| China Chemical Saiding Green energy<br>Technology  | BTM                  | 380000 t/a  | Biomass,<br>Green H <sub>2</sub>                   |
| Yuanhuo Energy                                     | BTM                  | 700000 t/a  | Biomass,<br>Green H <sub>2</sub>                   |
| Goldwind green energy chemical industry            | BTM                  | 500000 t/a  | Biomass,<br>Green H <sub>2</sub>                   |
| Cnina Energy Engineering Corporation Limited       | BTM                  | 300000 t/a  | Biomass,<br>Green H <sub>2</sub>                   |
| Chifeng Green hydrogen chain Technology Co.<br>LTD | BTM                  | 300000 t/a  | Biomass,<br>CO <sub>2</sub> , Green H <sub>2</sub> |

---

---

Approximate elemental analysis of crop straw and coal are shown in Table S2.

**Table S2.** Composition analysis of the feed coal and crop straw.

|                           | Coal   | Crop straw |
|---------------------------|--------|------------|
| <b>Proximate analysis</b> |        |            |
| MOISTURE                  | 9.54   | 5.53       |
| FC                        | 9.64   | 2.69       |
| VM                        | 39.45  | 80.79      |
| ASH                       | 50.91  | 11         |
| <b>Ultimate analysis</b>  |        |            |
| C                         | 74.455 | 45.01      |
| H                         | 4.955  | 6.09       |
| N                         | 1.585  | 0.6        |
| Cl                        | 2.44   | 0.043      |
| S                         | 0.065  | 0.15       |
| O                         | 6.84   | 40.04      |

---

Distribution of crude syngas components with different key gasification parameters are shown in Fig.S1.

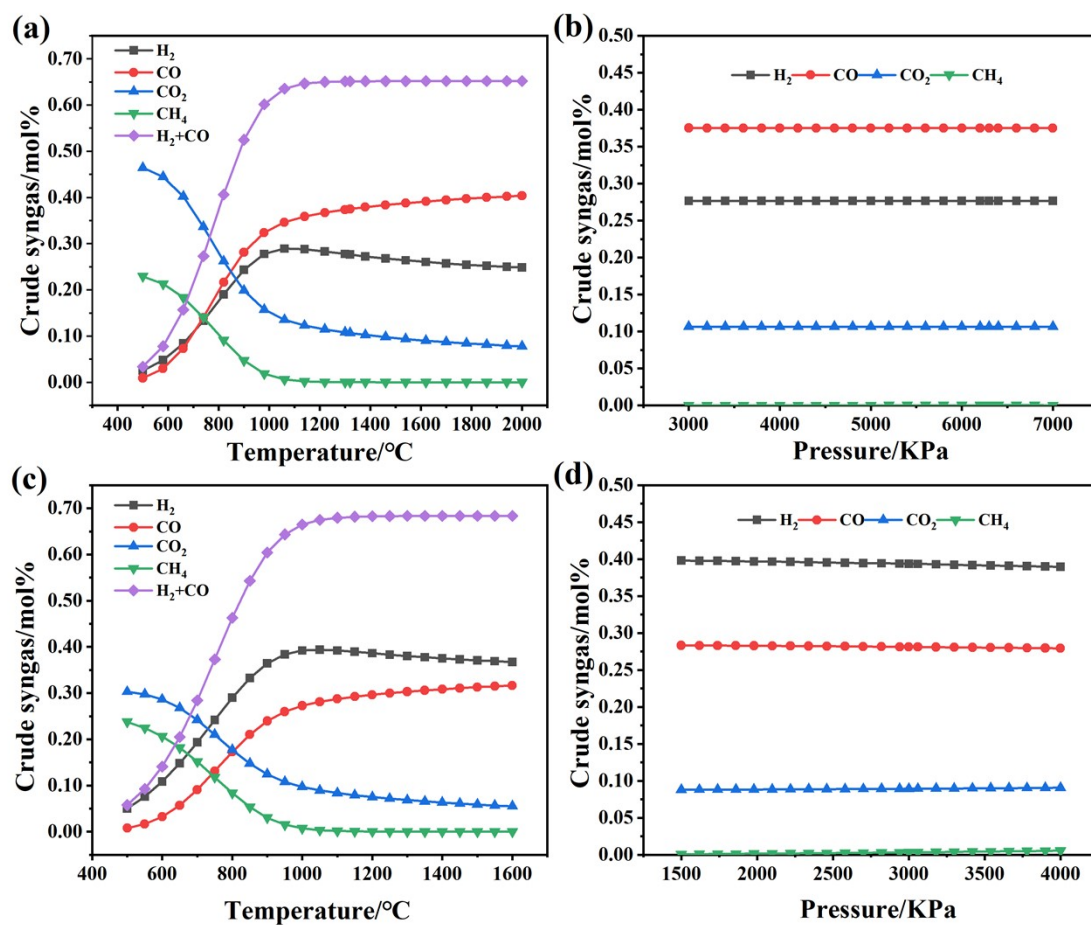

**Fig.S1.** Distribution of crude syngas components with different key gasification parameters:  
 (a) Coal gasification temperature; (b) Coal gasification pressure; (c) Biomass gasification temperature; (d) Biomass gasification pressure

CTM, GH<sub>2</sub>-CTM and BTM processes industry/ literature and simulation data are listed in the Table S3.

**Table S3.** CTM, GH<sub>2</sub>-CTM and BTM processes industry/ literature and simulation data.

|                            | Units                                  | Industry/literature data <sup>1</sup> |                      |         | Simulation data |                      |         |
|----------------------------|----------------------------------------|---------------------------------------|----------------------|---------|-----------------|----------------------|---------|
|                            |                                        | CTM                                   | GH <sub>2</sub> -CTM | BTM     | CTM             | GH <sub>2</sub> -CTM | BTM     |
| Temperature                | °C                                     | 1320                                  |                      | 1050    | 1320            |                      | 1050    |
| Pressure                   | KPa                                    | 6300                                  |                      | 3000    | 6300            |                      | 3000    |
| Coal/Biomass               | t/h                                    | 1036.53                               |                      | 1188.46 | 1042.53         |                      | 1188.46 |
| O <sub>2</sub>             | t/h                                    | 839.81                                |                      | -       | 860.06          |                      | 200     |
| (CO+H <sub>2</sub> )       | ×10 <sup>4</sup><br>Nm <sup>3</sup> /h |                                       | 168.69               |         | 168.37          |                      | 168.46  |
| Converted gas              | t/h                                    | 156.78                                | 130.51               | -       | 162.02          | 132.32               | 87.55   |
| Unconverted gas            | t/h                                    | 693.79                                | 847.9                | -       | 677.16          | 832.92               | 747.34  |
| Synthesis gas              | t/h                                    | 850.57                                | 978.41               | 850.57  | 839.18          | 965.24               | 834.89  |
| GH <sub>2</sub> supplement | t/h                                    | -                                     | 28.07                | -       | -               | 29.08                | -       |
| Methanol                   | t/h                                    | 780.94                                | 926.88               | 780.94  | 774.48          | 924.02               | 786.79  |
| Purge gas                  | t/h                                    | 23.62                                 | 25.3                 | 23.62   | 26.42           | 27.77                | 17.14   |

## 2. Technical and economic analysis

Cost estimation of purchase equipment cost and total capital investment are listed in the Table S4.

**Table S4.** Cost estimation of purchase equipment cost and total capital investment.

| Parameter    | Benchmark                     | $S_0$     | $TCI_0$ ,<br>M\$ | $\alpha$ | $S_{CTM}$ | $TCI_{CTM}$ ,<br>M\$ | $S_{CTM-GH_2}$ | $TCI_{CTM-GH_2}$ ,<br>M\$ | $S_{BTM}$ | $TCI_{BTM}$ ,<br>M\$ | Ref. year | Ref. |
|--------------|-------------------------------|-----------|------------------|----------|-----------|----------------------|----------------|---------------------------|-----------|----------------------|-----------|------|
|              |                               | Reference | CTM              |          |           | CTM-GH <sub>2</sub>  |                | BTM                       |           |                      |           |      |
| ASU          | O <sub>2</sub> supply (kg/s)  | 21.3      | 45.7             | 0.5      | 238.9     | 177.63               | 159.27         | 145.04                    | 79.6      | 102.54               | 2018      | 2    |
| RAPT         | Raw coal (kg/s)               | 27.4      | 29.1             | 0.67     | 289.6     | 163.94               | 289.6          | 163.94                    | \         | \                    | 2018      | 2    |
|              | Straw (t/h)                   | 33.5      | 11.46            | 0.85     | \         | \                    | \              | \                         | 1188.5    | 421.02               | 2002      | 3    |
| GU           | Coal input (t/d)              | 9000      | 148.05           | 0.67     | 25020     | 340.89               | 25020          | 340.89                    | \         | \                    | 2018      | 4    |
|              | Biomass input (t/d)           | 2000      | 63.4             | 0.67     | \         | \                    | \              | \                         | 28523     | 500.96               | 2007      | 5    |
| WGS          | CO+H <sub>2</sub> (kmol/h)    | 8819      | 14.4             | 0.65     | 38312     | 49.82                | 30048          | 42.54                     | 22543     | 35.30                | 2007      | 5    |
| AGR          | CO <sub>2</sub> removal (t/h) | 327       | 64.6             | 0.67     | 1368      | 195.59               | 1161           | 175.23                    | 809       | 137.56               | 2018      | 2    |
| MS           | Feed syngas (kmol/s)          | 10.8      | 20.4             | 0.29     | 20.8      | 28.63                | 24.8           | 30.13                     | 20.8      | 28.63                | 2018      | 2    |
| MD           | Feed methanol (kg/s)          | 3.66      | 1.72             | 0.65     | 215.1     | 28.20                | 256.7          | 31.63                     | 218.6     | 28.49                | 2018      | 2    |
| Electrolyzer | Feed H <sub>2</sub> (t/d)     | 50        | 53.2             | 0.92     | \         | \                    | 697.92         | 692.67                    | \         | \                    | 2019      | 6    |

---

CEPCI of different years is shown in Table S5.

**Table S5.** CEPCI of different years.

|       | Years | Value | Ref. |
|-------|-------|-------|------|
|       | 2021  | 699.7 | 7    |
|       | 2019  | 607.5 | 7    |
| CEPCI | 2018  | 603.1 | 7    |
|       | 2017  | 567.5 | 8    |
|       | 2007  | 525.4 | 8    |
|       | 2002  | 395.6 | 8    |



The prices of raw materials, products, utilities and transportation involved in the three synthetic routes are shown in Table S6. Among them, the price of green hydrogen is simply estimated, and the formula is shown as S1. Electricity price has the greatest influence on the cost of green hydrogen, and the price distribution of green hydrogen under different electricity prices is shown in Table S7.

$$TPC_{GH_2} = P_e \times EC_e + P_w \times EC_w + P_i + P_m + P_s \quad (S1)$$

$TPC_{GH_2}$  represents the price of green hydrogen, the unit is CNY/t;  $P_e$  represents the price of electricity, the unit is CNY/kwh;  $EC_e$  represents the electricity consumption, the unit is kwh;  $P_w$  represents the price of water, the unit is CNY/t;  $EC_w$  represents the water consumption, the unit is t;  $P_i$ ,  $P_m$ ,  $P_s$  respectively represents the depreciation cost of electrolytic cell equipment, maintenance costs and staff salaries, the unit is CNY/t.

**Table S6.** The prices of raw materials, products, utilities and transportation involved in the three synthetic routes.

| Items              | Units                | Price    | Ref.  |
|--------------------|----------------------|----------|-------|
| Coal               | CNY/t                | 400      |       |
| Straw              | CNY/t                | 450      |       |
| LP steam           | CNY/t                | 170.22   | 9     |
| MP steam           | CNY/t                | 200.26   | 9     |
| HP steam           | CNY/t                | 220.24   | 9     |
| Cooling water      | CNY/t                | 0.34     | 9     |
| Electricity        | CNY/kwh              | 0.4      | 10    |
| Fuel coal          | CNY/t                | 800      | 10    |
| Refrigerant(-40°C) | CNY/GJ               | 46.2     | 9     |
| Transportation     | Coal/Biomass-Railway | CNY/t·km | 0.167 |
|                    | Coal/Biomass-Highway | CNY/t·km | 0.37  |

|                         |                         |       |    |
|-------------------------|-------------------------|-------|----|
| H <sub>2</sub> -Highway | CNY/tH <sub>2</sub> ·km | 78.12 | 11 |
| O <sub>2</sub> -Highway | CNY/tO <sub>2</sub> ·km | 3.92  | 12 |

**Table S7.** The price distribution of green hydrogen under different electricity prices.

| Items                      | Value   |         |         |         |         |        |
|----------------------------|---------|---------|---------|---------|---------|--------|
|                            | 0.4     | 0.35    | 0.3     | 0.25    | 0.2     | 0.13   |
| Electricity price          | 0.4     | 0.35    | 0.3     | 0.25    | 0.2     | 0.13   |
| Green H <sub>2</sub> price | 19526.6 | 17276.6 | 15026.6 | 12776.6 | 10526.6 | 7376.6 |

---

The outcomes of fixed investment and cost estimation are shown in Table S8.

**Table S8.** Detailed results of techno-economic analysis.

| Items                                     | CTM           | GH2-CTM       | BTM           |
|-------------------------------------------|---------------|---------------|---------------|
| Production scale (t/h)                    | 770           | 918           | 772           |
| Fixed investment (M\$)                    | 984.7         | 929.4         | 1254.5        |
| Raw Material cost (CNY/t)                 | 541.6         | 1071.8        | 692.1         |
| Pretreatment cost (CNY/t)                 | 34.4          | 28.9          | 101.9         |
| Transportation cost (CNY/t)               | 163.2         | 152.4         | 202.4         |
| Utilities cost (CNY/t)                    | 1081.6        | 891.6         | 999.6         |
| Employee salary (CNY/t)                   | 3.2           | 2.7           | 4.9           |
| Maintenance and depreciation cost (CNY/t) | 78.3          | 62.1          | 99.5          |
| Administrative and overhead cost (CNY/t)  | 40.7          | 46.3          | 45.4          |
| Marketing cost (CNY/t)                    | 38.1          | 44.2          | 42.1          |
| <b>Total production cost (CNY/t)</b>      | <b>1981.1</b> | <b>2299.9</b> | <b>2187.9</b> |

### 3. Life cycle environmental assessment

The unified converted value of the energy-consuming working medium is listed in the Table S9.

**Table S9.** The unified converted value of energy consuming working medium.<sup>13</sup>

| Items                      | Energy conversion value <sup>a</sup><br>(kgEo) |
|----------------------------|------------------------------------------------|
| LP steam (1.0 MPa, 125°C)  | 76/t                                           |
| MP steam (4.0 MPa, 180°C)  | 88/t                                           |
| HP steam (10.0 MPa, 250°C) | 92/t                                           |
| Electricity                | 0.22/kwh                                       |
| Cooling water              | 0.06/t                                         |
| Fuel coal                  | 700/t                                          |
| Refrigerant(-50°C)         | 0.06/MJ                                        |

a: This standard stipulates that the data unit of energy consumption is kgEo, and the energy consumption data unit of the calculation results under this standard is converted to kgce. (1 kgEo $\approx$ 1.4286 kgce)

GHG indirect emission factors are listed in the Table S8.

$$IE_{CO_2} = I_{CO_2} \times LHV_{CO_2} \times EC \times 44/12 \quad (S2)$$

$$IE_{CH_4} = I_{CH_4} \times LHV_{CH_4} \times EC \quad (S3)$$

$$IE_{N_2O} = I_{N_2O} \times LHV_{N_2O} \times EC \quad (S4)$$

Where IE represents an indirect emission, unit is tCO<sub>2</sub>; I is indirect emission factor, unit is t·CO<sub>2</sub>/MJ; EC is process energy consumption quality, unit is t; LHV is the low calorific value, unit is MJ/t. Emission data is calculated according to Formula S2-S4.

**Table S10.** The indirect GHG emission factors.<sup>14</sup>

| Items                    | LHV<br>(MJ/t) | I <sub>CO<sub>2</sub></sub> (tCO <sub>2</sub> /MJ) | I <sub>N<sub>2</sub>O</sub> (tCO <sub>2</sub> /MJ) | I <sub>CH<sub>4</sub></sub> (tCO <sub>2</sub> /MJ) |
|--------------------------|---------------|----------------------------------------------------|----------------------------------------------------|----------------------------------------------------|
| Standard oil             | 41868         | 25.33 × 10 <sup>-6</sup>                           | 0.41 × 10 <sup>-9</sup>                            | 0.07 × 10 <sup>-6</sup>                            |
| Standard coal            | 29308         | 5.73 × 10 <sup>-6</sup>                            | 0.17 × 10 <sup>-9</sup>                            | 0.43 × 10 <sup>-6</sup>                            |
| Crude oil                | 41816         | 16 × 10 <sup>-6</sup>                              | 0.27 × 10 <sup>-9</sup>                            | 0.05 × 10 <sup>-6</sup>                            |
| Crude coal               | 20908         | 4.26 × 10 <sup>-6</sup>                            | 0.06 × 10 <sup>-9</sup>                            | 0.42 × 10 <sup>-6</sup>                            |
| Fuel gas                 | 45998         | 25.33 × 10 <sup>-6</sup>                           | 0.41 × 10 <sup>-9</sup>                            | 0.07 × 10 <sup>-6</sup>                            |
| Fuel oil                 | 41816         | 25.33 × 10 <sup>-6</sup>                           | 0.41 × 10 <sup>-9</sup>                            | 0.07 × 10 <sup>-6</sup>                            |
| Fuel coal                | 29308         | 5.73 × 10 <sup>-6</sup>                            | 0.17 × 10 <sup>-9</sup>                            | 0.43 × 10 <sup>-6</sup>                            |
| Electricity <sup>a</sup> | 10.89         | 248.02 × 10 <sup>-6</sup>                          | 0.62 × 10 <sup>-9</sup>                            | 2.16 × 10 <sup>-6</sup>                            |

a: Unit is kW·h

PFCF in Table S11 represents the energy consumption factor, unit is MJ/MJ; and LHV is the low calorific value, unit is MJ/t.

**Table S11.** The primary consumption factor of NED.<sup>14</sup>

| Items                    | LHV<br>(MJ/t) | PFCF <sub>Crude oil</sub><br>(MJ/MJ) | PFCF <sub>Crude coal</sub><br>(MJ/MJ) | PFCF <sub>Crude gas</sub><br>(MJ/MJ) |
|--------------------------|---------------|--------------------------------------|---------------------------------------|--------------------------------------|
| Standard oil             | 41868         | 1.06                                 | 0.14                                  | 0.03                                 |
| Standard coal            | 29308         | 0.11                                 | 1.06                                  | 0.00                                 |
| Crude oil                | 41816         | 1.05                                 | 0.1                                   | 0.02                                 |
| Crude coal               | 20908         | 0.00                                 | 1.05                                  | 0.00                                 |
| Fuel gas                 | 45998         | 1.06                                 | 0.14                                  | 0.03                                 |
| Fuel oil                 | 41816         | 1.06                                 | 0.14                                  | 0.03                                 |
| Fuel coal                | 29308         | 0.11                                 | 1.06                                  | 0.00                                 |
| Electricity <sup>a</sup> | 10.89         | 0.37                                 | 2.86                                  | 0.03                                 |

a: Unit is Kw/h.

---

## References

1. Z. Bai, Q. B. Liu, L. Gong and J. Lei, *Appl. Energy*, 2019, **243**, 91-101.
2. H. Huang, S. Y. Yang and P. Z. Cui, *Energy Conv. Manag.*, 2018, **157**, 186-194.
3. C. N. Hamelinck, A. P. C. Faaij, H. den Uil and H. Boerrigter, *Energy*, 2004, **29**, 1743-1771.
4. Y. J. Zhao, Q. Liu, Y. Y. Duan, Y. K. Zhang, Y. Huang, L. J. Shi, J. C. Wang and Q. Yi, *Energy Conv. Manag.*, 2022, **268**, 20.
5. H. F. Zhang, L. G. Wang, M. Pérez-Fortes, J. Van Herle, F. Maréchal and U. Desideri, *Appl. Energy*, 2020, **258**, 14.
6. D. D. James B, Huya-Kouadio J, *Analysis of advanced H2 production & delivery Pathways.*, [https://www.hydrogen.energy.gov/docs/hydrogenprogramlibraries/pdfs/review18/pd102\\_james\\_2018\\_p.pdf](https://www.hydrogen.energy.gov/docs/hydrogenprogramlibraries/pdfs/review18/pd102_james_2018_p.pdf), 2018.
7. R. Junsittiwate, T. R. Srinophakun and S. Sukpancharoen, *Energy Sustain Dev.*, 2022, **66**, 140-150.
8. E. Adu, Y. D. Zhang, D. H. Liu and P. Tontiwachwuthikul, *Energies*, 2020, **13**, 28.
9. J. X. Liu, X. Zhou, G. F. Yang, H. Zhao, Z. B. Zhang, X. Feng, H. Yan, Y. B. Liu, X. B. Chen and C. H. Yang, *Chin. J. Chem. Eng.*, 2023, **57**, 290-308.
10. *Sinopec Project Feasibility Study Technical Economy-Parameter & Data.*, Sinopec Economic & Development Research Institute., 2021.
11. Y. J. Zhao, Q. Liu, Y. Y. Duan, Y. K. Zhang, Y. Cui, Y. Huang, D. Gao, L. J. Shi, J. C. Wang and Q. Yi, *Int. J. Hydrog. Energy*, 2022, **47**, 19338-19352.
12. M. Balys, E. Brodawka, A. Korzeniewska, J. Szczurowski and K. Zarebska, *Sci. Total Environ.*, 2021, **786**, 14.
13. *Standard for calculation of energy consumption in petrochemical engineering design. GB/T 50441-2016.*, 2016.
14. X. Zhou, H. Yan, X. Feng, H. Zhao, Y. B. Liu, X. B. Chen and C. H. Yang, *Ind. Eng. Chem. Res.*, 2020, **59**, 20086-20101.
